# Supplementary figures and images for: Baseline Gut Microbiome Signatures Correlate with Immunogenicity of SARS-CoV-2 mRNA Vaccines
Source: MDPI journal article supplement (doi:10.3390/ijms241411703), 2023-07-20

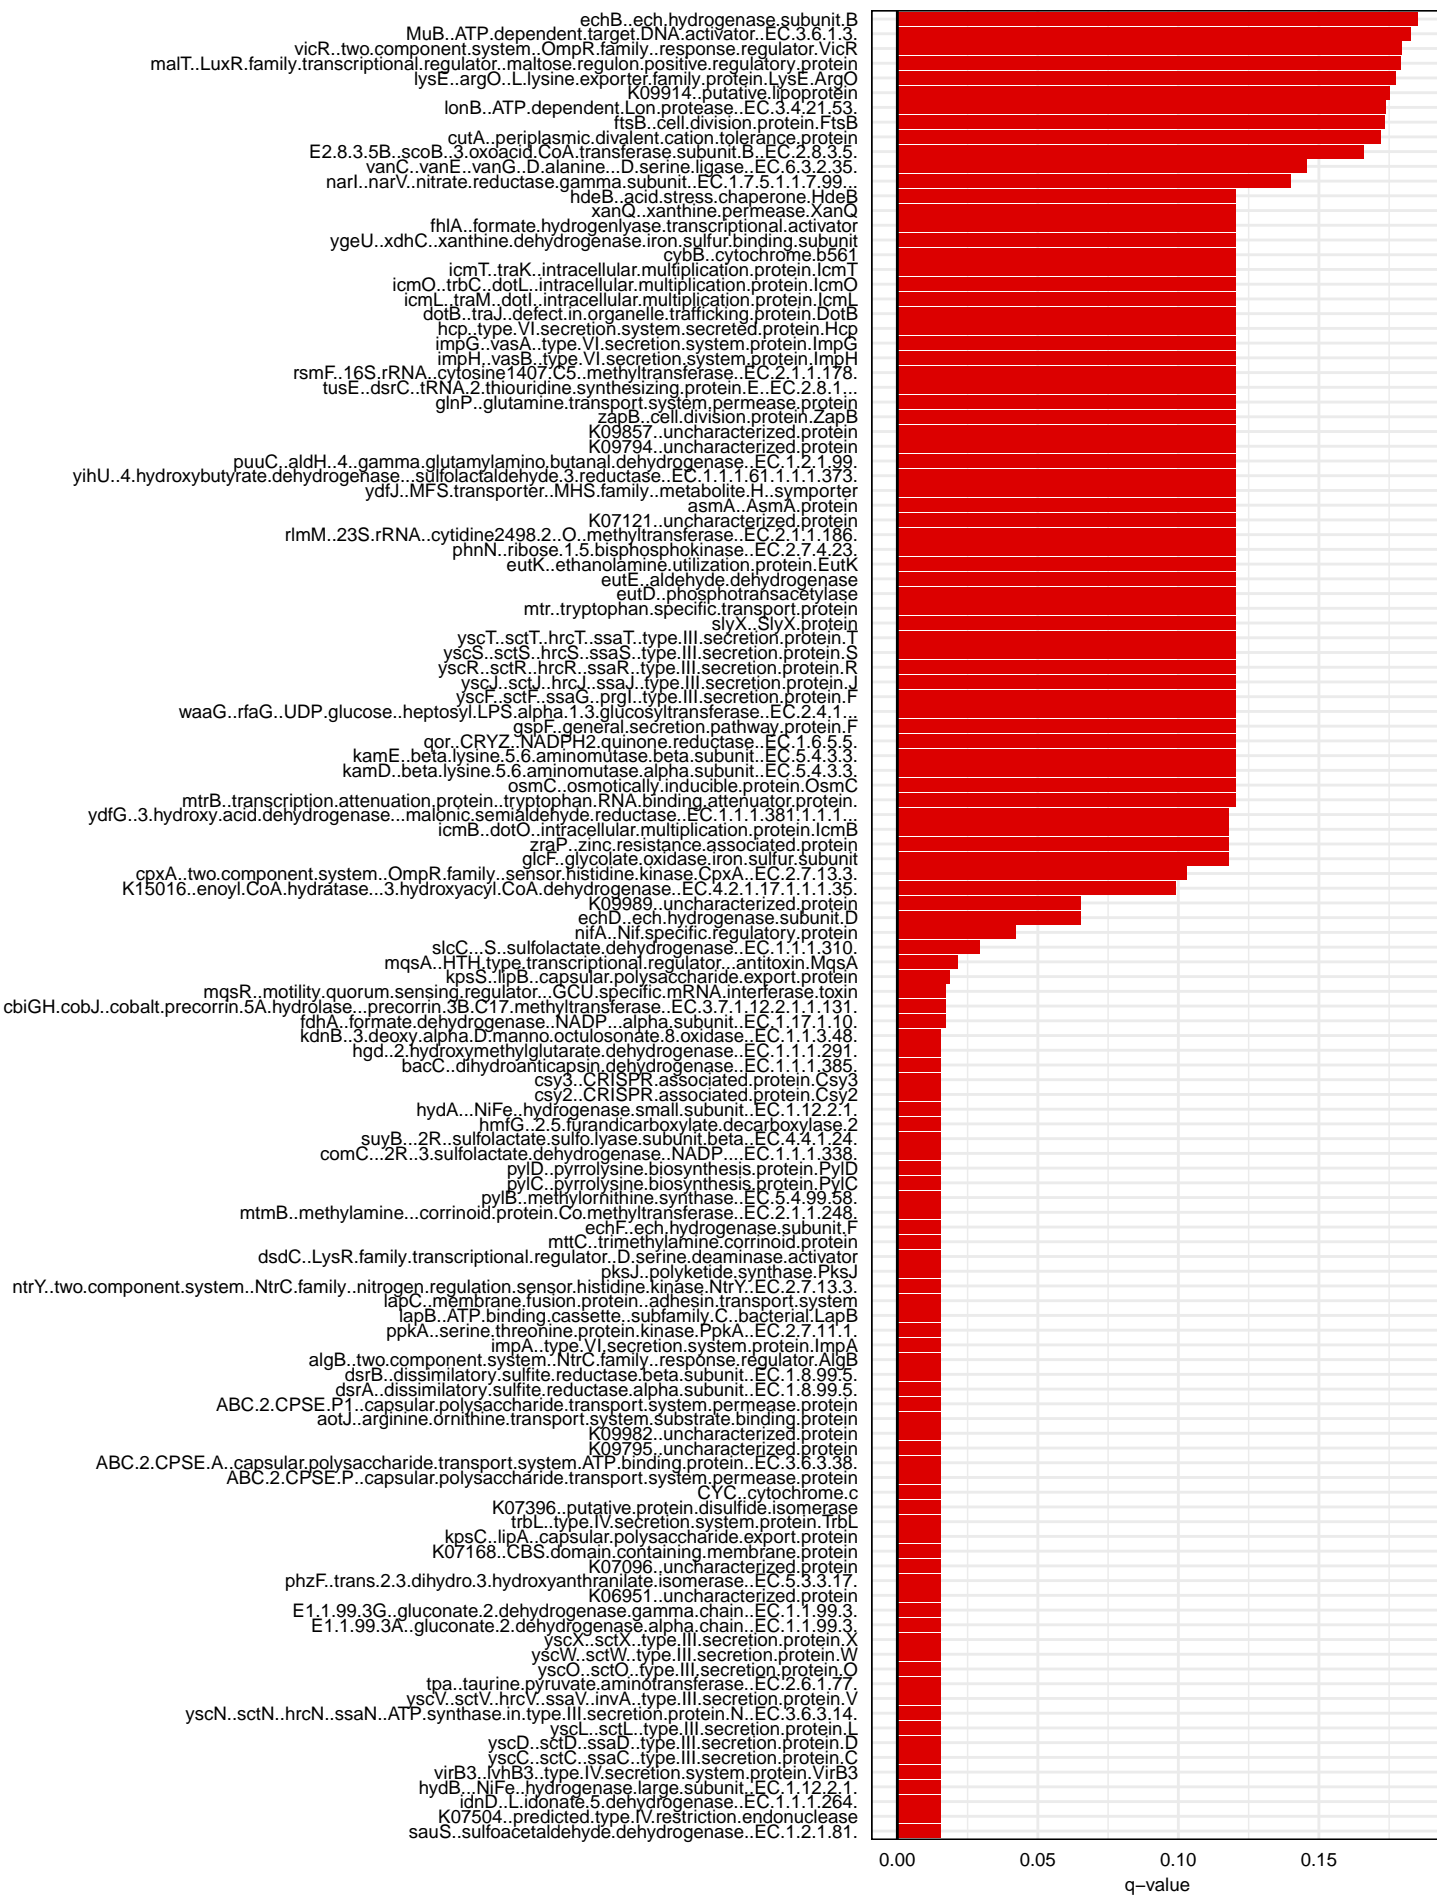

Supplement: s1 [file s1]
